# Supplementary material for: Understanding the impact of environmental variability and fisheries on the red sea urchin population in Baja California
Source: Frontiers journal article supplement (doi:10.3389/fmars.2022.987242), 2022-11-24
Supplement: Data_Sheet_1.docx [file Data_Sheet_1.docx]

### *S1. Supplementary material 1. Time lag of significant variables.*


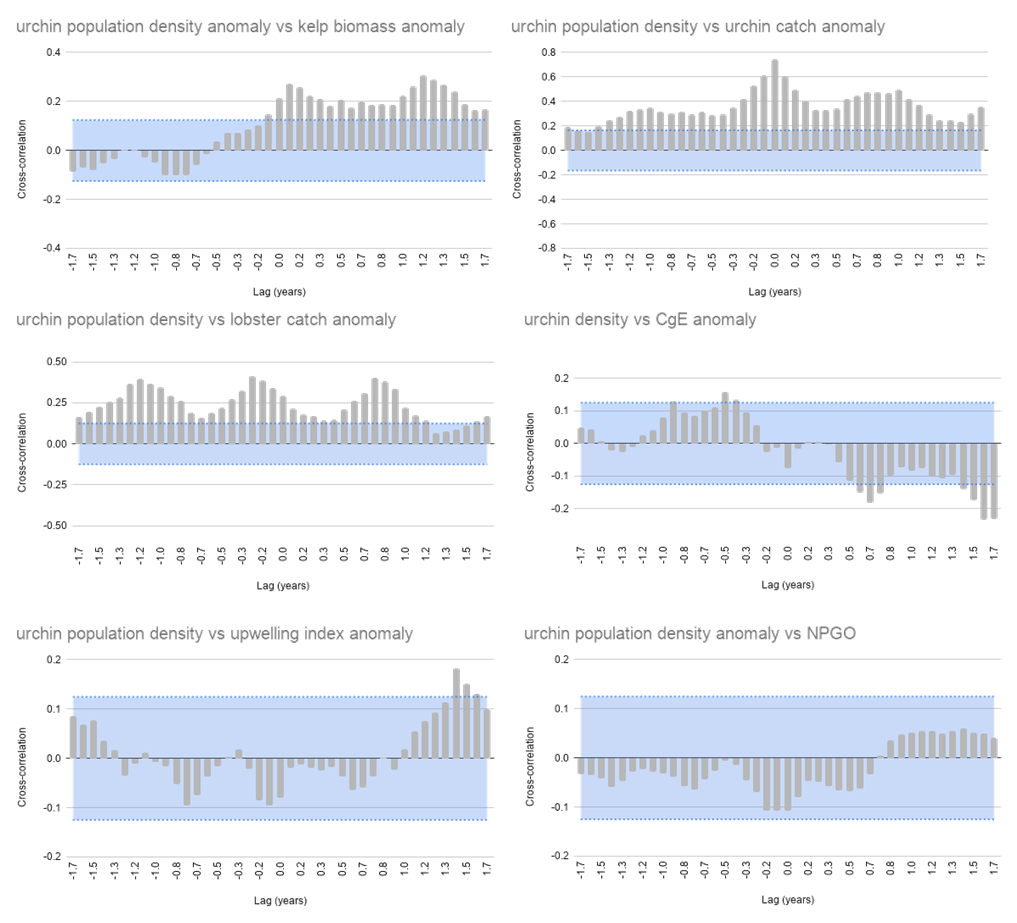


S1. 1. Cross-correlation functions for significant variables for model GLM00-18 (Full time series).


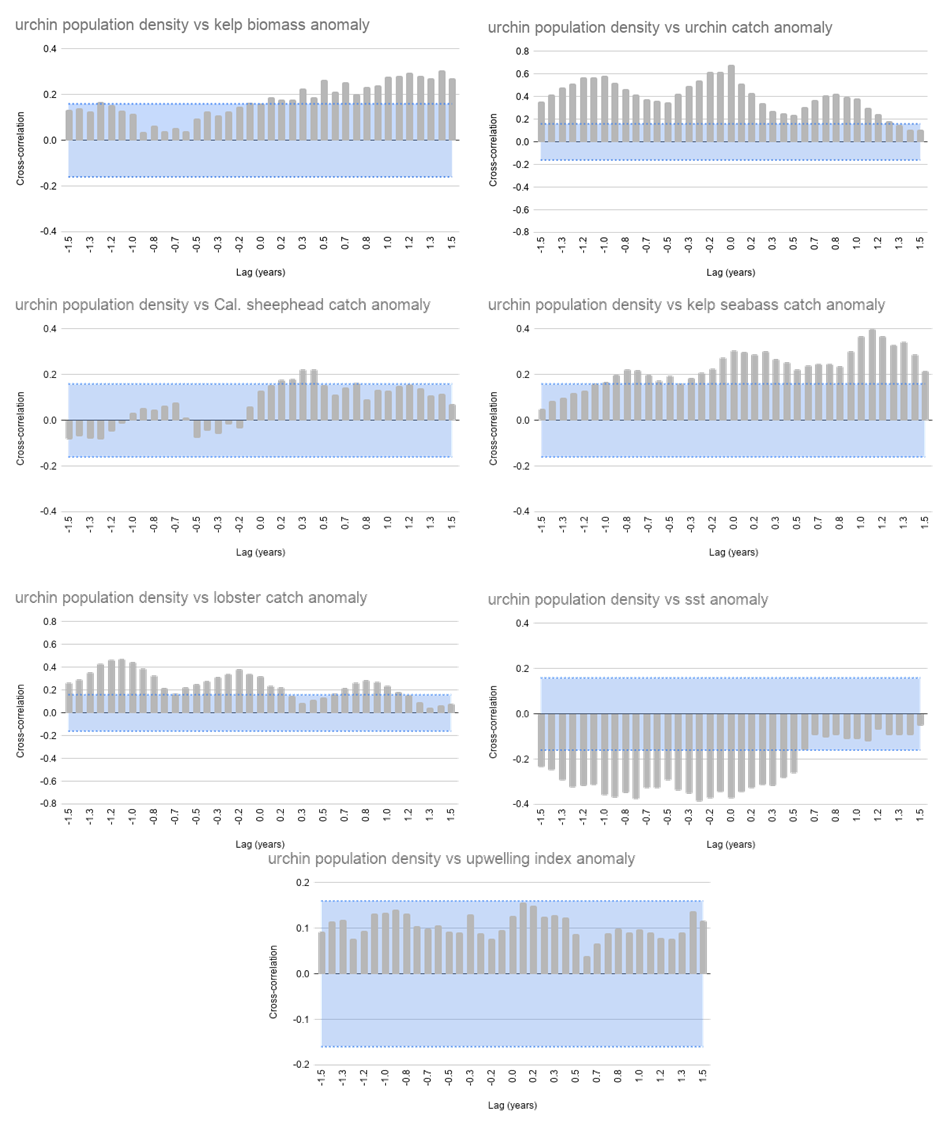


S1. 2. Cross-correlation functions for significant variables for model GLM00-11 (Pre – heatwave).


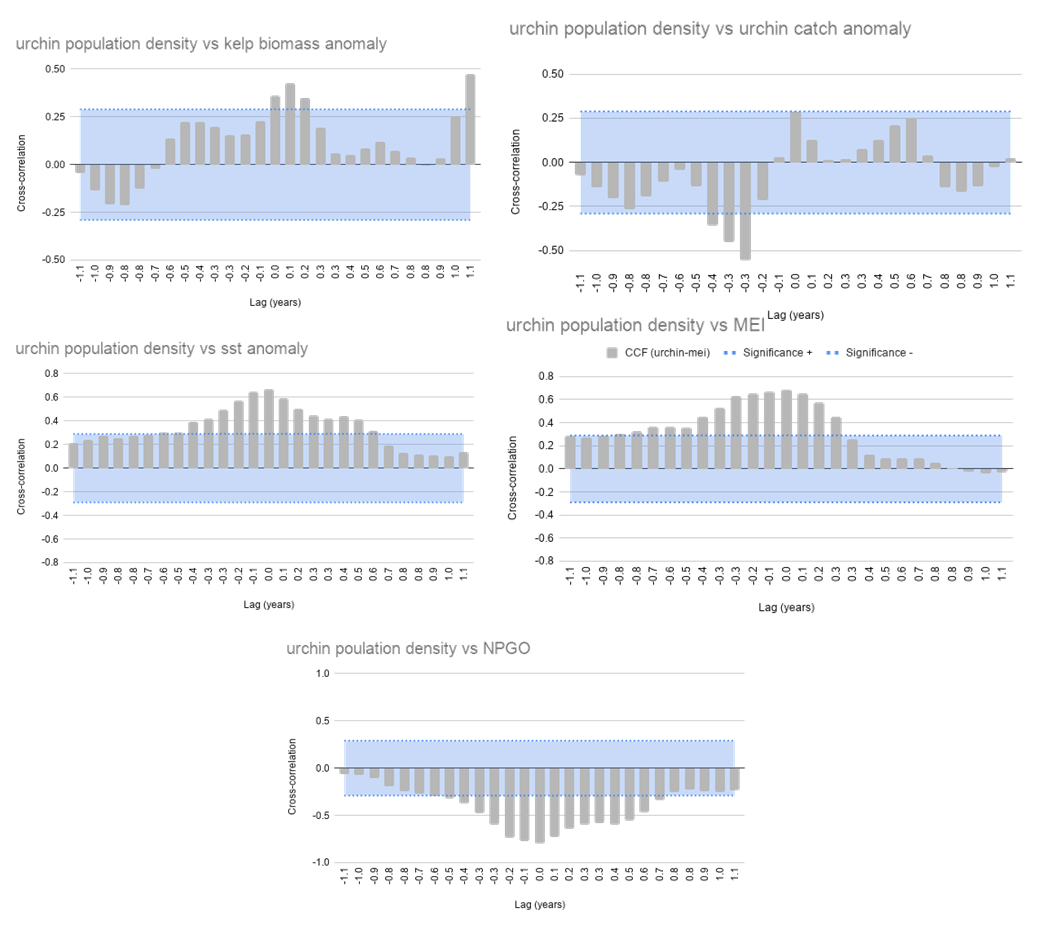


S1. 3. Cross-correlation functions for significant variables for model GLM12-15 (Heatwave).


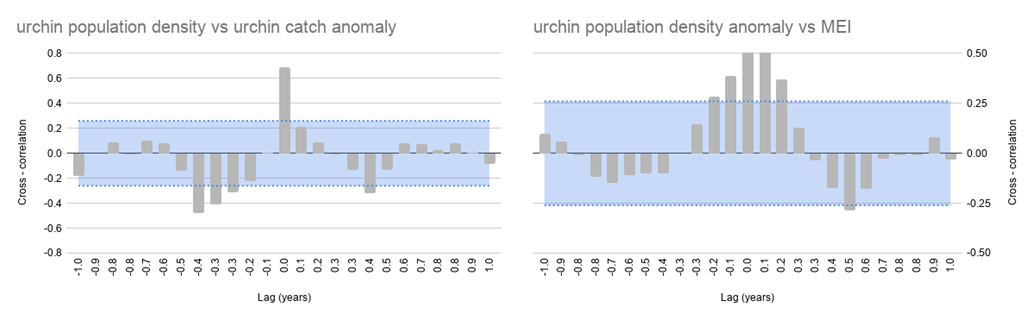


S1. 4. Cross-correlation functions for significant variables for model GLM16-18 (Post – heatwave).
